# Supplementary material for: In-cell infection: a novel pathway for Epstein-Barr virus infection mediated by cell-in-cell structures
Source: PubMed Central journal article supplement — Cell Res. 2015 Apr 28;25(7):785–800. doi: 10.1038/cr.2015.50 (PMC4493273; doi:10.1038/cr.2015.50), 2015-04-28
Supplement: cr201550x1.pdf [file cr201550x1.pdf]

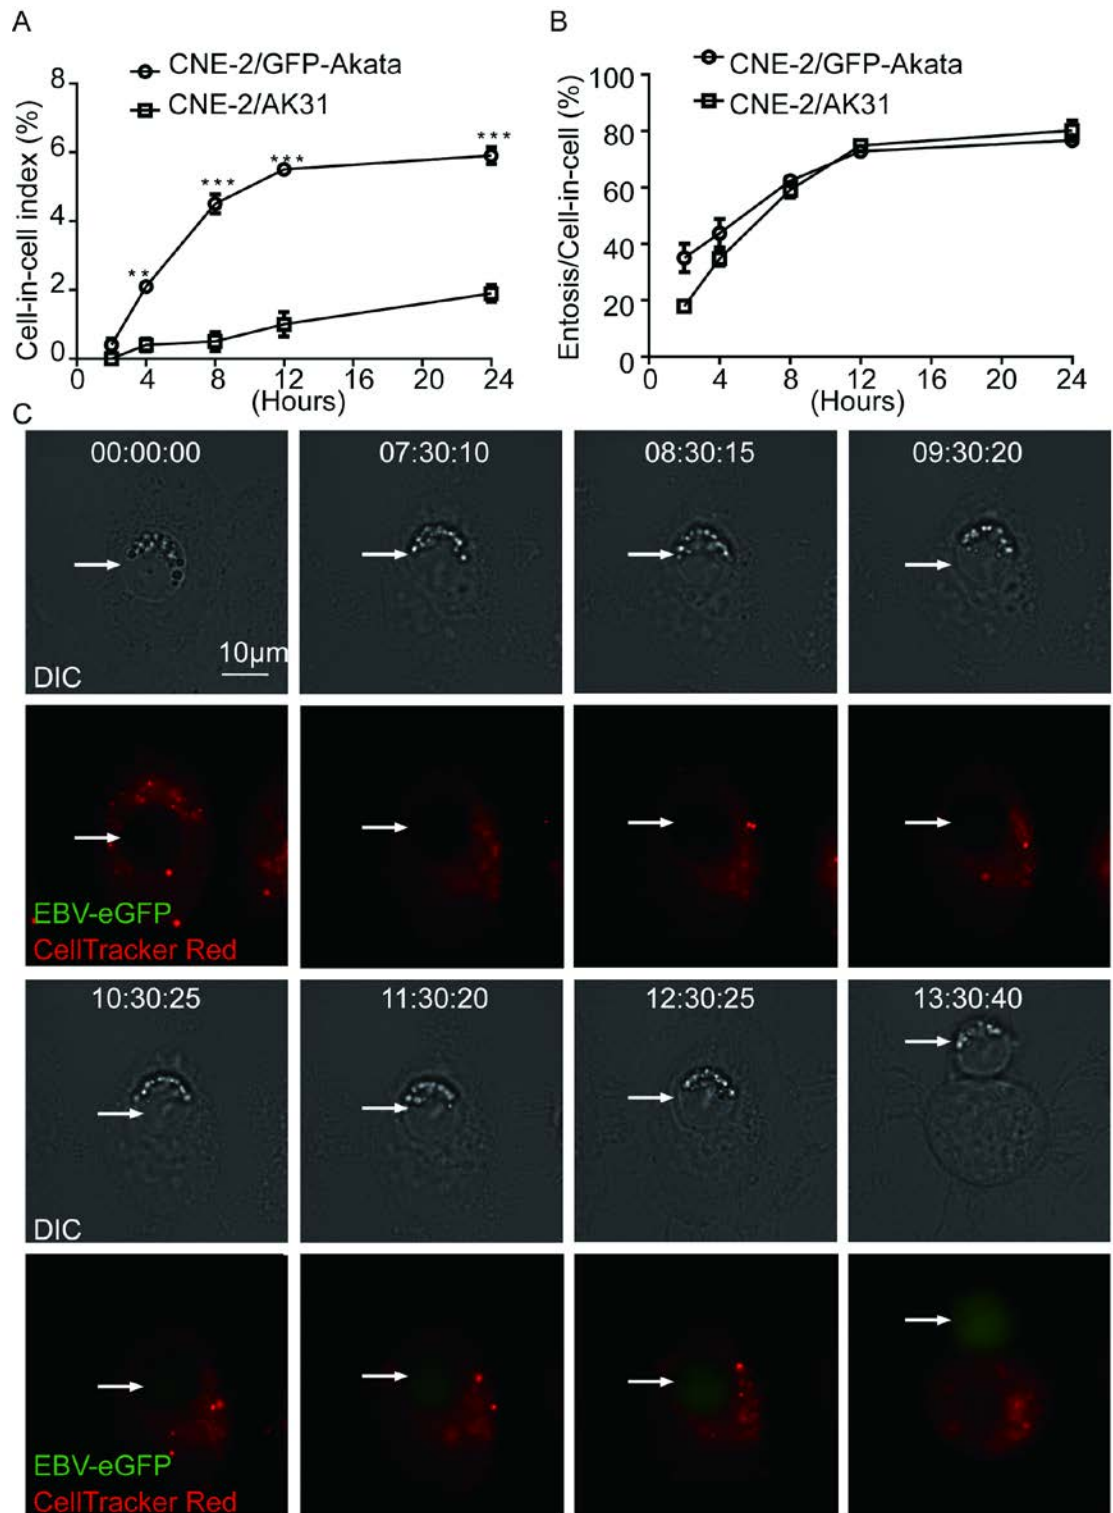

Figure S1. Activation of EBV within cell-in-cell structures formed between GFP-Akata and CNE-2 cells

(A): Kinetic percentages of cell-in-cell structures between GFP-Akata/CNE-2 and AK31/CNE-2 cells. The CNE-2 cells were co-cultured with GFP-Akata or

AK31 cells at ratio of 1:10. The frequencies of cell-in-cell structures were counted at indicated hours.

(B): Statistic analysis of the death of internalized GFP-Akata or AK31 cells within CNE-2 cells at indicated hours after the co-culture.

(C): Time tracking analysis of EBV activation in internalized GFP-Akata cells after penetration into CNE-2 cells. It was notable that internalized GFP-Akata cells became GFP positive at time 10:30:25. Time was indicated as hour:minute:second. (Scale bar: 10  $\mu$ m).
