# Supplementary material for: In-cell infection: a novel pathway for Epstein-Barr virus infection mediated by cell-in-cell structures
Source: PubMed Central journal article supplement — Cell Res. 2015 Apr 28;25(7):785–800. doi: 10.1038/cr.2015.50 (PMC4493273; doi:10.1038/cr.2015.50), 2015-04-28
Supplement: cr201550x2.pdf [file cr201550x2.pdf]

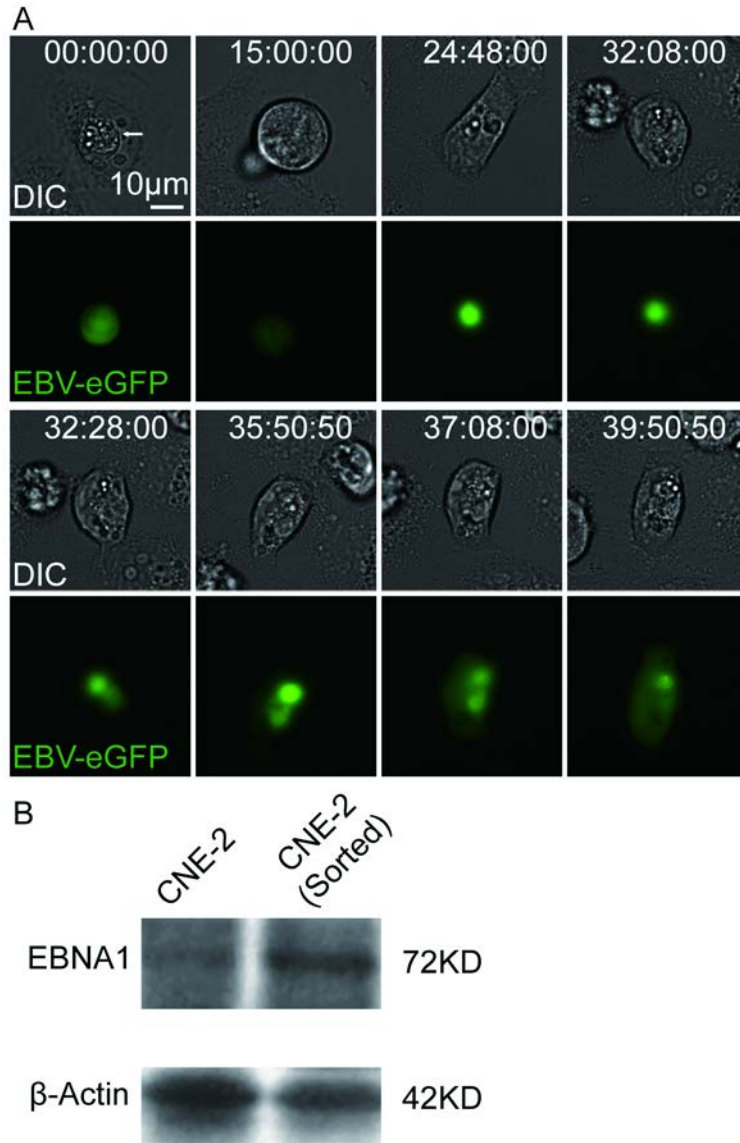

Figure S2. In-cell infection of CNE-2 cells by EBV from internalized GFP-Akata cells

(A): Time tracking analysis of EBV diffusion from internalized GFP-Akata cells inside CNE-2 cells. The CNE-2 cells were co-cultured with GFP-Akata cells at ratio of 1:10 and recorded by time-lapse microscopy. Internalized GFP-Akata cells started to die at time 15:00:00 and the target CNE-2 cells started to express GFP at time 32:28:00. Time was indicated as hour:minute:second. (Scale bar: 10  $\mu$ m).

(B): Expression of Epstein-Barr nuclear antigen1 (EBNA1) in in-cell infected CNE-2

cells by Western blotting analysis.
