# Supplementary material for: In-cell infection: a novel pathway for Epstein-Barr virus infection mediated by cell-in-cell structures
Source: PubMed Central journal article supplement — Cell Res. 2015 Apr 28;25(7):785–800. doi: 10.1038/cr.2015.50 (PMC4493273; doi:10.1038/cr.2015.50), 2015-04-28
Supplement: cr201550x4.pdf [file cr201550x4.pdf]

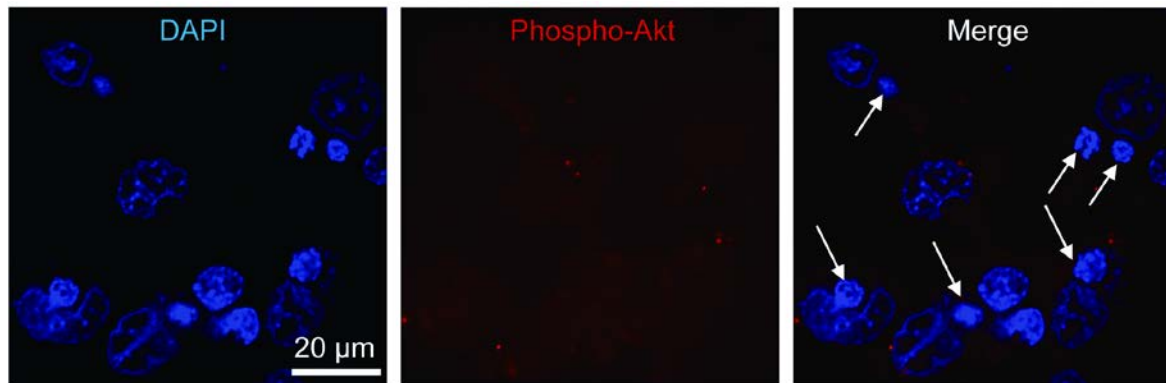

Figure S4. Determination of AKT phosphorylation in AK31 cells within cell-in-cell structures formed with CNE-2 cells

AK31 cells were co-cultured with CNE-2 cells for 12 h and the phosphorylation of AKT in AK31 cells (indicated by white arrow) was detected by immunofluorescence staining using anti-phospho-AKT antibody followed by DAPI staining. The images were captured under a confocal laser scanning microscope. (Scale bar: 20 μm)
